# Supplementary material for: Tourist Agroforestry Landscape from the Perception of Local Communities: A Case Study of Rwenzori, Uganda
Source: MDPI journal article supplement (doi:10.3390/land11050650), 2022-04-28

**QUESTIONNAIRE**  
**Mubuku Valley local community survey: interview outline**

First of all, we would like to ask you a few questions in order to understand the local people perception of their place of living, tourism and environment in Mubuku Valley.  
The questions are related to Mubuku Valley that is outside Rwenzori Mountains National Park.

1. Age: .....

2. Gender:

☐ M      ☐ F

3. Place of residence: .....

Place of origin: .....

4. Education level:

☐ No formal education    ☐ Primary school    ☐ Secondary school    ☐ Tertiary - University

5. What is your status?

☐ Paid employment or self-employment (please specify occupation) .....

☐ Farming (please specify the type of crops).....

☐ Home duties

☐ Volunteer work (please specify sector) .....

☐ Unemployed

☐ Study (please specify sector) .....

☐ Retired

☐ Other (please describe) .....

6. What is your main source of livelihood?

.....

7. Are you a landowner?

☐ Yes – Which is the size of your land area? ..... ☐ No

8. Do you belong to an environmental organisation?

☐ Yes – Which? ..... ☐ No

9. What is your perception of Mubuku Valley?

☐ Bad    ☐ Somewhat bad    ☐ Neither    ☐ Somewhat beautiful    ☐ Beautiful    ☐ I don't know

10. Please tell us if the following elements influence your perception of Mubuku Valley? (1=Bad; 2=Somewhat bad; 3=Neither; 4=Somewhat beautiful; 5= Beautiful).

|                                  | Bad → Beautiful |   |   |   |   | I don't know | Not pertinent |
|----------------------------------|-----------------|---|---|---|---|--------------|---------------|
| Nature in general                | 1               | 2 | 3 | 4 | 5 |              |               |
| Crops                            | 1               | 2 | 3 | 4 | 5 |              |               |
| Rivers                           | 1               | 2 | 3 | 4 | 5 |              |               |
| Villages                         | 1               | 2 | 3 | 4 | 5 |              |               |
| Rwenzori Mountains National Park | 1               | 2 | 3 | 4 | 5 |              |               |
| Local people                     | 1               | 2 | 3 | 4 | 5 |              |               |
| Forest                           | 1               | 2 | 3 | 4 | 5 |              |               |
| Wild animals                     | 1               | 2 | 3 | 4 | 5 |              |               |
| Panoramic views                  | 1               | 2 | 3 | 4 | 5 |              |               |
| Pastures                         | 1               | 2 | 3 | 4 | 5 |              |               |
| Hills                            | 1               | 2 | 3 | 4 | 5 |              |               |
| Tourism                          | 1               | 2 | 3 | 4 | 5 |              |               |
| Roads                            | 1               | 2 | 3 | 4 | 5 |              |               |
| Boda bodas                       | 1               | 2 | 3 | 4 | 5 |              |               |
| Trails                           | 1               | 2 | 3 | 4 | 5 |              |               |
| Security                         | 1               | 2 | 3 | 4 | 5 |              |               |
| Exotic plants (not local)        | 1               | 2 | 3 | 4 | 5 |              |               |
| Other.....                       | 1               | 2 | 3 | 4 | 5 |              |               |

11. What comes in your mind when you think of Mubuku Valley? You can tick more than one box.

- |                                   |                                     |                                      |                                      |
|-----------------------------------|-------------------------------------|--------------------------------------|--------------------------------------|
| <input type="checkbox"/> Hopeful  | <input type="checkbox"/> Lost       | <input type="checkbox"/> Satisfied   | <input type="checkbox"/> Pessimistic |
| <input type="checkbox"/> Joyous   | <input type="checkbox"/> Struggling | <input type="checkbox"/> Beloved     | <input type="checkbox"/> Upset       |
| <input type="checkbox"/> Attached | <input type="checkbox"/> Alone      | <input type="checkbox"/> Lucky       | <input type="checkbox"/> Frustrated  |
| <input type="checkbox"/> Peaceful | <input type="checkbox"/> Optimistic | <input type="checkbox"/> Indifferent | <input type="checkbox"/> Useless     |
- Other .....

Why?

.....

.....

12. Which of the following elements are essential to describe the place you live? You can tick more than one box.

- |                                      |                                            |                                       |                                   |
|--------------------------------------|--------------------------------------------|---------------------------------------|-----------------------------------|
| <input type="checkbox"/> Home        | <input type="checkbox"/> Crops             | <input type="checkbox"/> Roads        | <input type="checkbox"/> Terraces |
| <input type="checkbox"/> Forest      | <input type="checkbox"/> Trails            | <input type="checkbox"/> Hills        | <input type="checkbox"/> Villages |
| <input type="checkbox"/> Tourism     | <input type="checkbox"/> Local people      | <input type="checkbox"/> River        | <input type="checkbox"/> Pasture  |
| <input type="checkbox"/> Bodas bodas | <input type="checkbox"/> Nature in general | <input type="checkbox"/> Wild animals | <input type="checkbox"/> Family   |
| <input type="checkbox"/> Friends     | <input type="checkbox"/> Your property     | <input type="checkbox"/> Culture      |                                   |
- Other .....

13. What is your perception of the tourism in Mubuku Valley community?

☐ Negative     
 ☐ Somewhat negative     
 ☐ Neither     
 ☐ Somewhat positive     
 ☐ Positive     
 ☐ I don't know

14. Would you like more tourists in this region?

☐ Yes – Why? ..... ☐ No

15. According to you, is the (landscape) of Mubuku Valley attractive for tourism?

☐ Strongly agree     
 ☐ Agree     
 ☐ Neither     
 ☐ Disagree     
 ☐ Strongly disagree     
 ☐ I don't know

16. Which of the following features do you consider more important to be improved/changed to make Mubuku Valley more attractive for visitors? Please select three most important features.

- |                                                            |                                                        |                                          |
|------------------------------------------------------------|--------------------------------------------------------|------------------------------------------|
| <input type="checkbox"/> Landscape and views               | <input type="checkbox"/> Trails network and quality    | <input type="checkbox"/> Flora and fauna |
| <input type="checkbox"/> Signposting and explanatory signs | <input type="checkbox"/> Cleanliness of the territory  | <input type="checkbox"/> Road            |
| <input type="checkbox"/> Hospitality                       | <input type="checkbox"/> Services, bars, shops         | <input type="checkbox"/> Security        |
| <input type="checkbox"/> Accommodation (hotels, camps)     | <input type="checkbox"/> Other (please describe) ..... |                                          |

17. Which are the pros (benefit) and the cons (negative impact) of tourism to Mubuku valley community? Please provide some examples.

Pros:

.....  
 .....  
 .....

Cons:

.....  
 .....  
 .....

18. According to your experience and knowledge, which are the most used trees in Mubuku Valley? Please list them.

| Trees | Uses |
|-------|------|
|       |      |
|       |      |
|       |      |
|       |      |
|       |      |
|       |      |

18. Among the following plants showed in the pictures which one is not native to Uganda? Please tick only one box.

Group 1: S1 ☐ S2 ☐ S3 ☐

19. Among the following plants showed in the pictures which one is not native to Uganda? Please tick only one box.

Group 2: L1 ☐ L2 ☐ L3 ☐

20. Have you ever planted the species in the picture? For what purposes?

S2

☐ Yes ☐ No Use: .....

L3

☐ Yes ☐ No Use: .....

21. Have these species shaped the appearance of Mubuku Valley?

☐ Bad ☐ Somewhat bad ☐ Neither ☐ Somewhat beautiful ☐ Beautiful ☐ I don't know

22. If their presence increases, what will be the impact on the (landscape) of Mubuku Valley?

☐ Bad ☐ Somewhat bad ☐ Neither ☐ Somewhat beautiful ☐ Beautiful ☐ I don't know

23. Please, according to your taste of preference, identify a score from 1 to 5 for each of the following pictures (1 is the lower value and 5 is the highest).

|             |                            |                            |                            |                            |                            |                                       |
|-------------|----------------------------|----------------------------|----------------------------|----------------------------|----------------------------|---------------------------------------|
| Picture F1  | <input type="checkbox"/> 1 | <input type="checkbox"/> 2 | <input type="checkbox"/> 3 | <input type="checkbox"/> 4 | <input type="checkbox"/> 5 | <input type="checkbox"/> I don't know |
| Picture F2  | <input type="checkbox"/> 1 | <input type="checkbox"/> 2 | <input type="checkbox"/> 3 | <input type="checkbox"/> 4 | <input type="checkbox"/> 5 | <input type="checkbox"/> I don't know |
| Picture F3  | <input type="checkbox"/> 1 | <input type="checkbox"/> 2 | <input type="checkbox"/> 3 | <input type="checkbox"/> 4 | <input type="checkbox"/> 5 | <input type="checkbox"/> I don't know |
| Picture F4  | <input type="checkbox"/> 1 | <input type="checkbox"/> 2 | <input type="checkbox"/> 3 | <input type="checkbox"/> 4 | <input type="checkbox"/> 5 | <input type="checkbox"/> I don't know |
| Picture F5  | <input type="checkbox"/> 1 | <input type="checkbox"/> 2 | <input type="checkbox"/> 3 | <input type="checkbox"/> 4 | <input type="checkbox"/> 5 | <input type="checkbox"/> I don't know |
| Picture F6  | <input type="checkbox"/> 1 | <input type="checkbox"/> 2 | <input type="checkbox"/> 3 | <input type="checkbox"/> 4 | <input type="checkbox"/> 5 | <input type="checkbox"/> I don't know |
| Picture F7  | <input type="checkbox"/> 1 | <input type="checkbox"/> 2 | <input type="checkbox"/> 3 | <input type="checkbox"/> 4 | <input type="checkbox"/> 5 | <input type="checkbox"/> I don't know |
| Picture F8  | <input type="checkbox"/> 1 | <input type="checkbox"/> 2 | <input type="checkbox"/> 3 | <input type="checkbox"/> 4 | <input type="checkbox"/> 5 | <input type="checkbox"/> I don't know |
| Picture F9  | <input type="checkbox"/> 1 | <input type="checkbox"/> 2 | <input type="checkbox"/> 3 | <input type="checkbox"/> 4 | <input type="checkbox"/> 5 | <input type="checkbox"/> I don't know |
| Picture F10 | <input type="checkbox"/> 1 | <input type="checkbox"/> 2 | <input type="checkbox"/> 3 | <input type="checkbox"/> 4 | <input type="checkbox"/> 5 | <input type="checkbox"/> I don't know |

Pictures

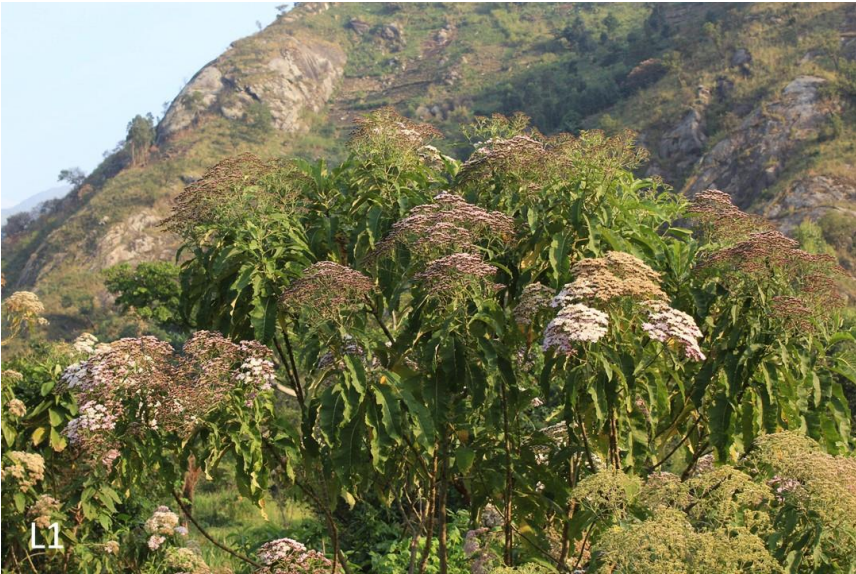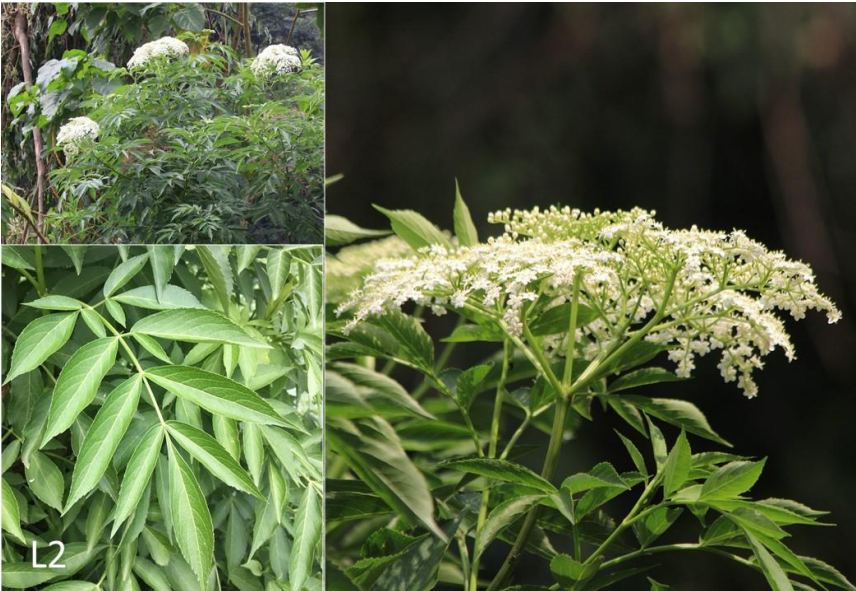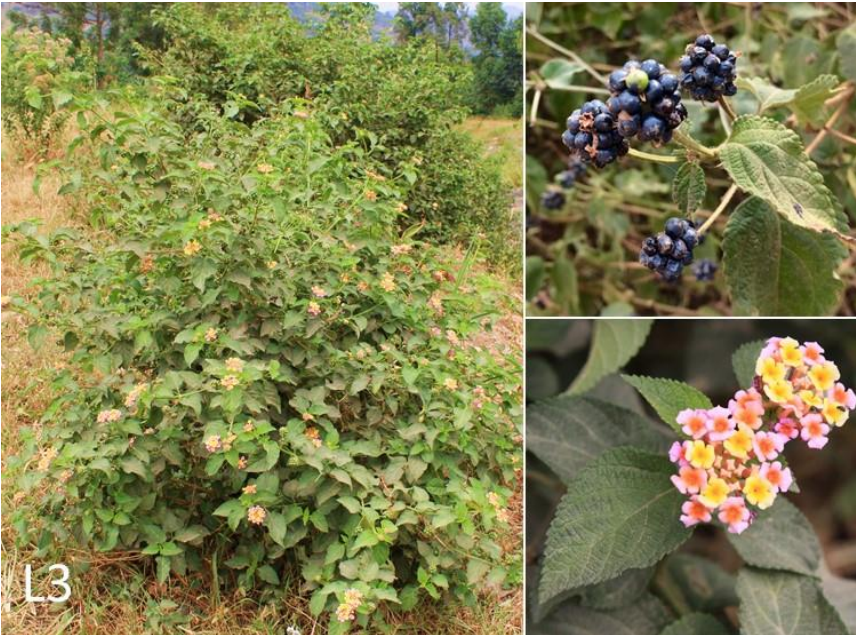



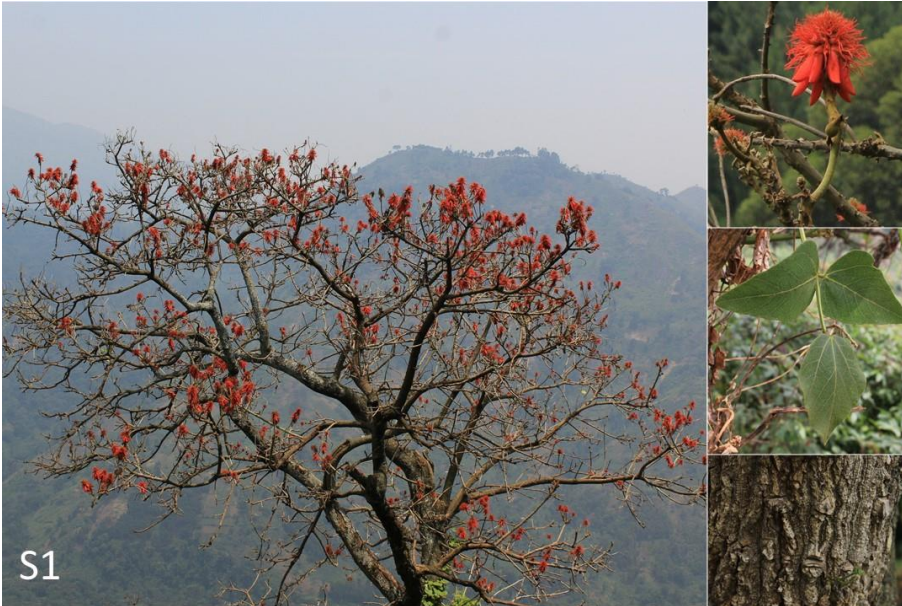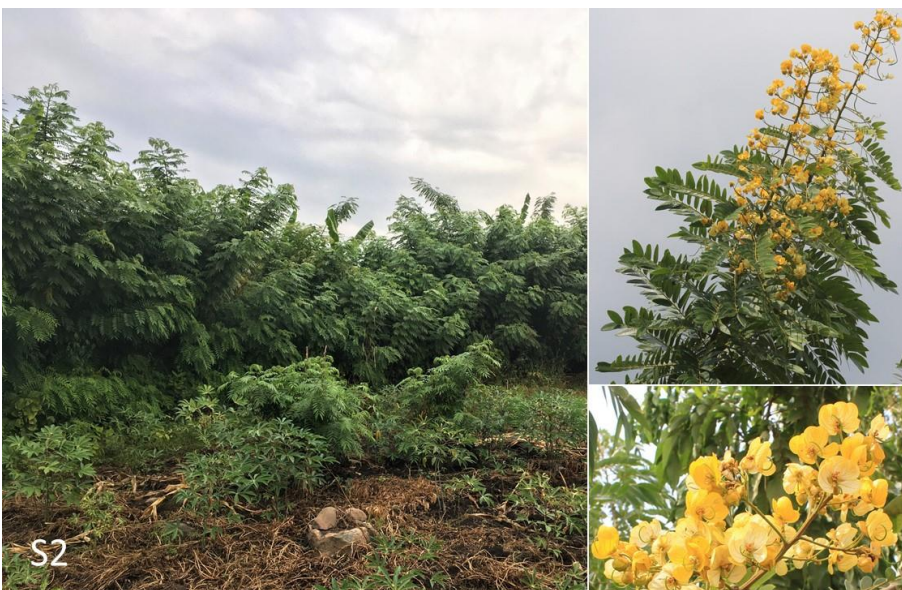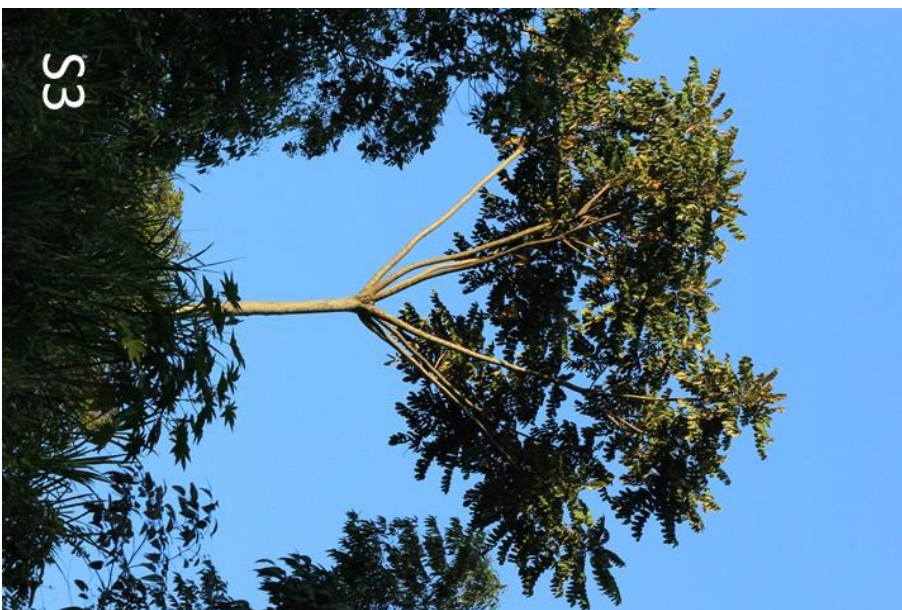



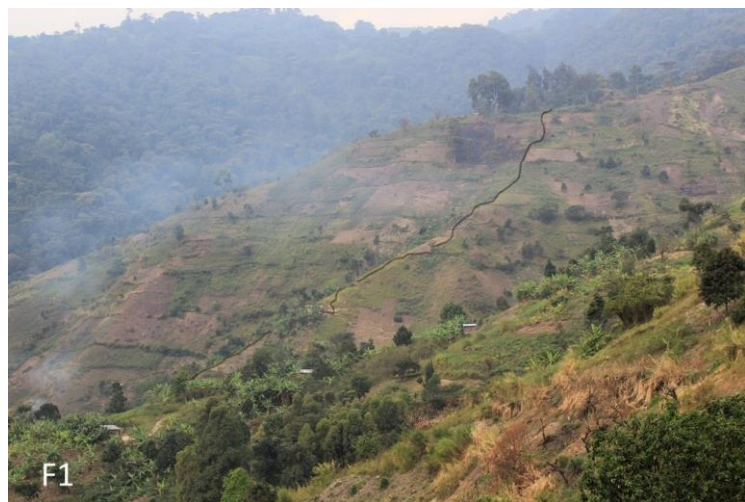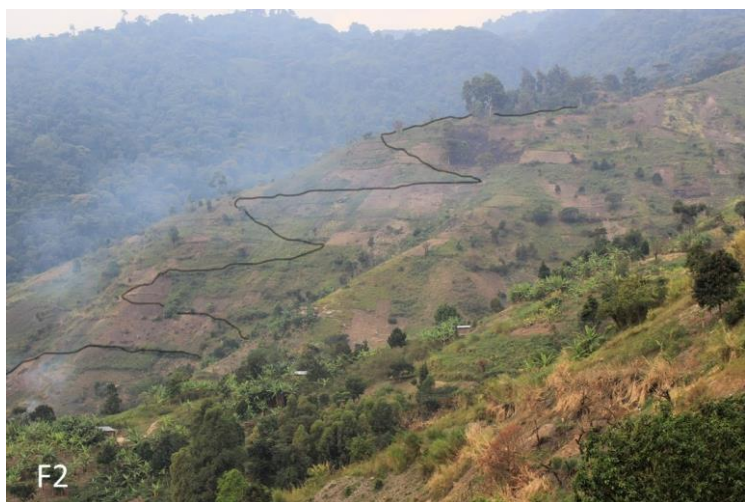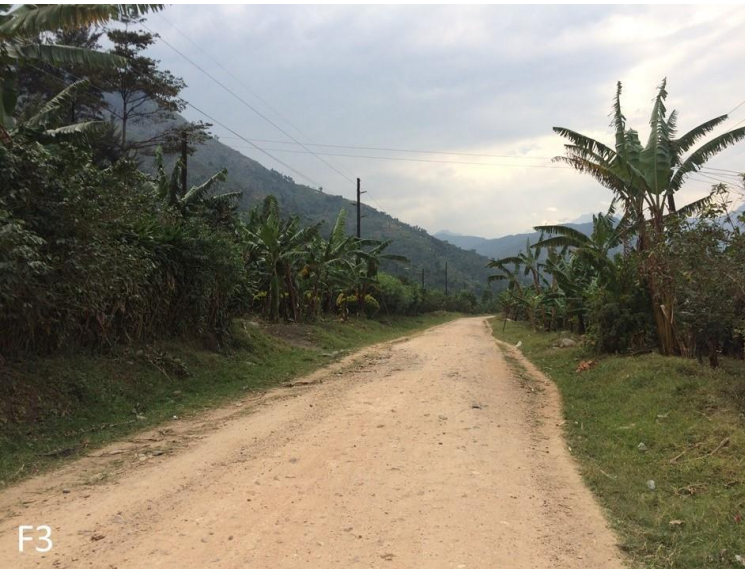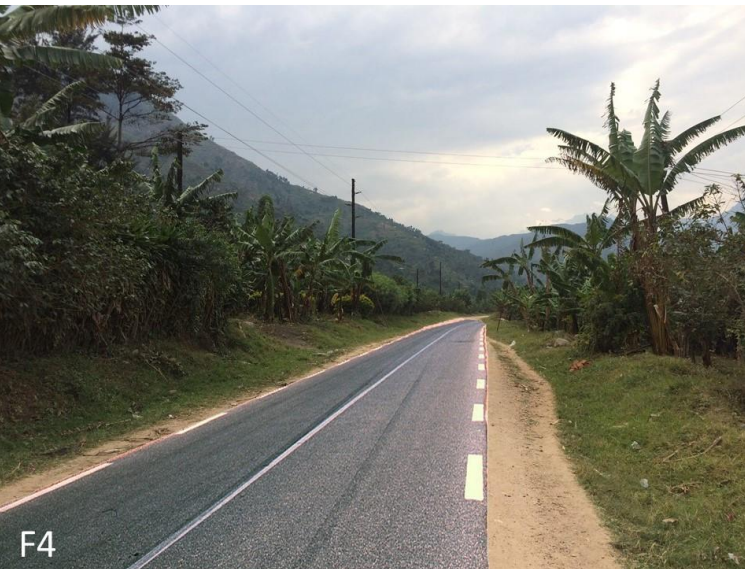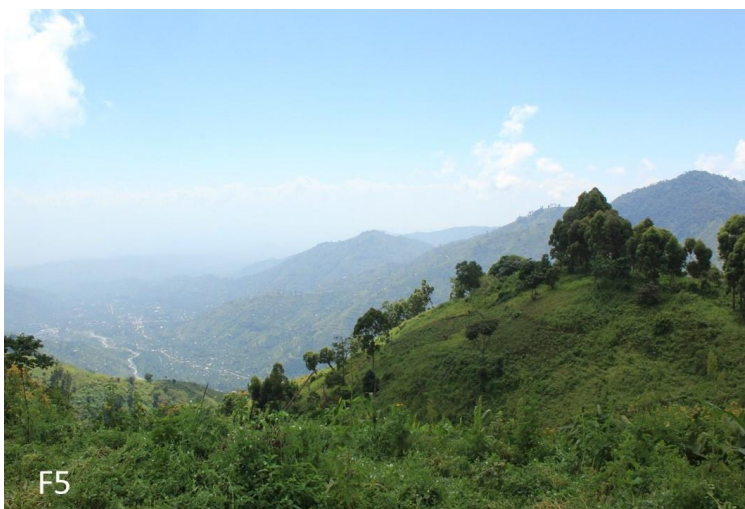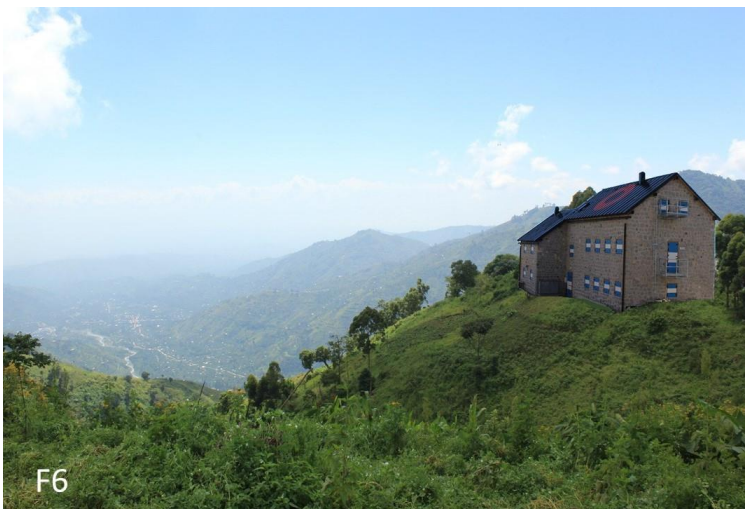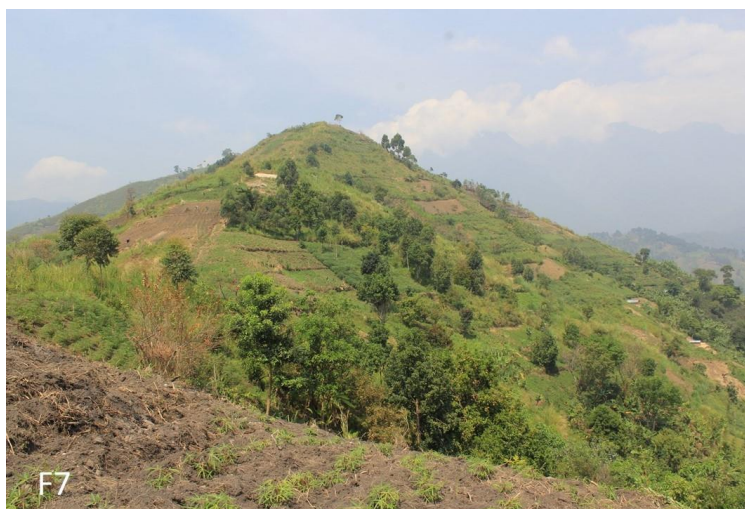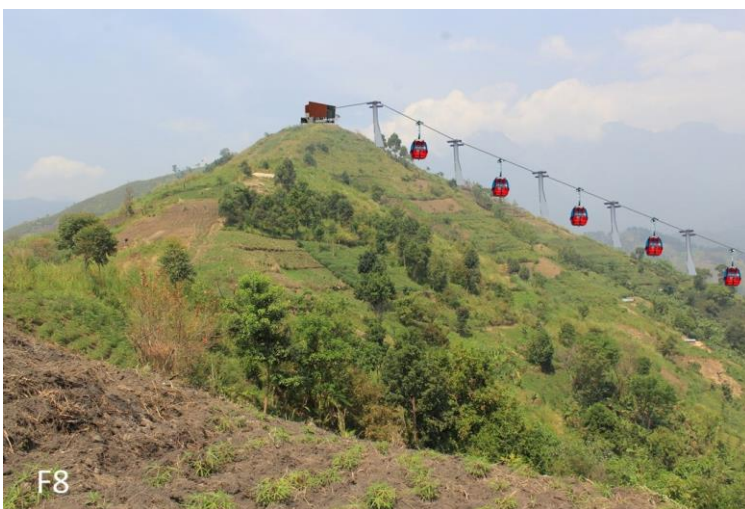

Supplement: s1 [file s1]
